# Supplementary material for: Effects of headwater wetland restoration on the demography and ecology of the federally threatened White Fringeless Orchid (Platanthera integrilabia) in the Cumberland Plateau of Kentucky, USA
Source: Research Square preprint supplement (doi:10.21203/rs.3.rs-6340443/v1), 2025-05-12
Supplement: Supplementary file 1 [file cd10541d45322d41aa906787.xlsx]

## Sheet: Sheet1
Title: Effects of headwater wetland restoration on the demography and ecology of the federally threatened White Fringeless Orchid (Platanthera integrilabia) in the Cumberland Plateau of Kentucky, USA. Biodiveristy and Conservation Journal. Littlefield, Tara and Chris Barton. Office of Kentucky Nature Preserves and Univeristy of Kentucky. Corresponding author. tara.littlefield@uky.edu/kentuckybota…
Family	Species name	Habit	Duration	Heliophytic index	Coefficient of conservatism value	Coefficient of Wetness	Wetland Code	wetland status	West 2009	West 2020	Center 2009	Center 2020	East 2009	East 2020
Sapindaceae	Acer rubrum var. trilobum	tree	perennial	5	3	0	FAC	Facultative; Hydrophyte; Occur in wetlands and non-wetlands	x	x	x	x	x	x
Rosaeae	Amelanchier arborea	tree	perennial	5	3	0	FAC	Facultative; Hydrophyte; Occur in wetlands and non-wetlands	x	x	x	x	x	x
Fabaceae	Apios americana	vine	perennial	7	4	-3	FACW	Facultative Wetland; Hydrophyte; Usually occur in wetlands, but may occur in non-wetlands	x	x	x	x	x	x
Araliaceae	Aralia spinosa	shrub	perennial	5	4	0	FAC	Facultative; Hydrophyte; Occur in wetlands and non-wetlands						x
Rosaeae	Aronia arbutifolia	shrub	perennial	6	7	-3	FACW	Facultative Wetland; Hydrophyte; Usually occur in wetlands, but may occur in non-wetlands					x	x
Rosaeae	Aronia melancarpa	shrub	perennial	7	6	0	FAC	Facultative; Hydrophyte; Occur in wetlands and non-wetlands	x	x	x	x	x	x
Aspleniaceae	Asplenium platyneuron	fern	perennial	4	3	3	FACU	Facultative Upland; Nonhydrophyte; Usually occur in non-wetlands, but may occur in wetlands				x
Dryopteridaceae	Athyrium asplenioides	fern	perennial	3	6	0	FAC	Facultative; Hydrophyte; Occur in wetlands and non-wetlands			x	x	x	x
Gentianaceae	Bartonia paniculata ssp. paniculata	forb	annual	5	9	-5	OBL	Obligate Wetland; Hydrophyte; Almost always occur in wetlands		x	x			x
Urticaceae	Boehmeria cylindrica	forb	perennial	5	5	-3	FACW	Facultative Wetland; Hydrophyte; Usually occur in wetlands, but may occur in non-wetlands				x
Poaceae	Calamagrostis coarctata	forb	perennial	8	8	-5	OBL	Obligate Wetland; Hydrophyte; Almost always occur in wetlands		x		x	x	x
Orchidaceae	Calopogon tuberosus	forb	perennial	8	10	-3	FACW	Facultative Wetland; Hydrophyte; Usually occur in wetlands, but may occur in non-wetlands				x
Cyperaceae	Carex complanata	graminoid	perennial	6	7	3	FACU	Facultative Upland; Nonhydrophyte; Usually occur in non-wetlands, but may occur in wetlands						x
Cyperaceae	Carex debilis	graminoid	perennial	5	6	0	FAC	Facultative; Hydrophyte; Occur in wetlands and non-wetlands	x	x		x	x	x
Cyperaceae	Carex intumescens	graminoid	perennial	4	7	-3	FACW	Facultative Wetland; Hydrophyte; Usually occur in wetlands, but may occur in non-wetlands				x
Cyperaceae	Carex tribuloides	graminoid	perennial	5	3	-3	FACW	Facultative Wetland; Hydrophyte; Usually occur in wetlands, but may occur in non-wetlands						x
Juglanaceae	Carya tomentosa	tree	perennial	4	5	5	UPL	Obligate Upland; Nonhydrophyte; Almost never occur in wetlands						x
Poaceae	Chasmanthium laxum	graminoid	perennial	5	7	0	FAC	Facultative; Hydrophyte; Occur in wetlands and non-wetlands	x	x	x	x	x	x
Plantaginaceae	Chelone glabra	forb	perennial	5	7	-5	OBL	Obligate Wetland; Hydrophyte; Almost always occur in wetlands						x
Ericaceae	Chimaphila maculata	forb/subshrub	perennial	3	7	0	FAC	Facultative; Hydrophyte; Occur in wetlands and non-wetlands		x	x	x		x
Ranunculaceae	Clematis virginiana	vine	perennial	6	4	0	FAC	Facultative; Hydrophyte; Occur in wetlands and non-wetlands				x
Asteraceae	Conoclinium coelestinum	forb	perennial	7	5	0	FAC	Facultative; Hydrophyte; Occur in wetlands and non-wetlands				x		x
Asteraceae	Coreopsis major	forb	perennial	6	6	5	UPL	Obligate Upland; Nonhydrophyte; Almost never occur in wetlands						x
Asteraceae	Coreopsis tripteris	forb	perennial	7	6	5	UPL	Obligate Upland; Nonhydrophyte; Almost never occur in wetlands	x		x	x	x	x
Cornaceae	Cornus florida	tree	perennial	5	5	3	FACU	Facultative Upland; Nonhydrophyte; Usually occur in non-wetlands, but may occur in wetlands					x	x
Cyperaceae	Cyperus acuminatus	graminoid	perennial	8	4	-5	OBL	Obligate Wetland; Hydrophyte; Almost always occur in wetlands				x
Orchidaceae	Cypripedium acaule	forb	perennial	4	7	3	FACU	Facultative Upland; Nonhydrophyte; Usually occur in non-wetlands, but may occur in wetlands			x	x
Poaceae	Dichanthelium boscii	graminoid	perennial	4	4	5	UPL	Obligate Upland; Nonhydrophyte; Almost never occur in wetlands					x	x
Poaceae	Dichanthelium commutatum ssp. commutatum	graminoid	perennial	5	4	3	FACU	Facultative Upland; Nonhydrophyte; Usually occur in non-wetlands, but may occur in wetlands						x
Poaceae	Dichanthelium microcarpon	graminoid	perennial	6	9	0	FAC	Facultative; Hydrophyte; Occur in wetlands and non-wetlands	x	x	x	x	x	x
Poaceae	Dichanthelium polyanthes	graminoid	perennial	7	5	5	UPL	Obligate Upland; Nonhydrophyte; Almost never occur in wetlands				x		x
Dioscoreaceae	Dioscorea villosa	vine	perennial	5	5	0	FAC	Facultative; Hydrophyte; Occur in wetlands and non-wetlands					x	x
Asteraceae	Doellingeria umbellata	forb	perennial	8	6	-3	FACW	Facultative Wetland; Hydrophyte; Usually occur in wetlands, but may occur in non-wetlands	x	x	x	x	x	x
Asteraceae	Elephantopus tomentosus	forb	perennial	5	4	0	FAC	Facultative; Hydrophyte; Occur in wetlands and non-wetlands				x
Asteraceae	Erechtites hieraciifolius	forb	perennial	6	1	3	FACU	Facultative Upland; Nonhydrophyte; Usually occur in non-wetlands, but may occur in wetlands				x		x
Celastraceae	Euonymus americanus	shrub	perennial	3	5	0	FAC	Facultative; Hydrophyte; Occur in wetlands and non-wetlands	x	x	x	x	x	x
Asteraceae	Eupatorium pilosum	forb	perennial	8	5	-3	FACW	Facultative Wetland; Hydrophyte; Usually occur in wetlands, but may occur in non-wetlands	x	x	x	x	x	x
Asteraceae	Eupatorium pubescens	forb	perennial	7	5	0	FAC	Facultative; Hydrophyte; Occur in wetlands and non-wetlands				x		x
Asteraceae	Eurybia surculosa	forb	perennial	8	4	5	UPL	Obligate Upland; Nonhydrophyte; Almost never occur in wetlands				x		x
Asteraceae	Eutrochium fistulosum	forb	perennial	7	5	-3	FACW	Facultative Wetland; Hydrophyte; Usually occur in wetlands, but may occur in non-wetlands	x	x	x	x	x	x
Asteraceae	Eutrochium purpureum	forb	perennial	5	5	0	FAC	Facultative; Hydrophyte; Occur in wetlands and non-wetlands	x	x	x	x	x	x
Fagaceae	Fagus grandifolia	tree	perennial	3	7	3	FACU	Facultative Upland; Nonhydrophyte; Usually occur in non-wetlands, but may occur in wetlands						x
Oleaceae	Fraxinus americana	tree	perennial	5	4	3	FACU	Facultative Upland; Nonhydrophyte; Usually occur in non-wetlands, but may occur in wetlands						x
Ericaceae	Gaylussacia baccata	shrub	perennial	5	6	3	FACU	Facultative Upland; Nonhydrophyte; Usually occur in non-wetlands, but may occur in wetlands			x	x	x	x
Gentianaceae	Gentiana saponaria	forb	perennial	7	8	-3	FACW	Facultative Wetland; Hydrophyte; Usually occur in wetlands, but may occur in non-wetlands	x	x	x	x		x
Asteraceae	Helianthus strumosus	forb	perennial	7	6	5	UPL	Obligate Upland; Nonhydrophyte; Almost never occur in wetlands				x
Fabaceae	Hylodesmum nudiflorum	forb	perennial	4	7	0	FAC	Facultative; Hydrophyte; Occur in wetlands and non-wetlands						x
Hypericaceae	Hypericum mutilum	forb	perennial	7	4	-3	FACW	Facultative Wetland; Hydrophyte; Usually occur in wetlands, but may occur in non-wetlands				x
Hypericaceae	Hypericum stragulum	forb	perennial	6	6	3	FACU	Facultative Upland; Nonhydrophyte; Usually occur in non-wetlands, but may occur in wetlands			x			x
Aquifoliaceae	Ilex opaca	shrub	perennial	4	5	3	FACU	Facultative Upland; Nonhydrophyte; Usually occur in non-wetlands, but may occur in wetlands	x	x	x	x	x	x
Aquifoliaceae	Ilex verticillata	shrub	perennial	4	5	-3	FACW	Facultative Wetland; Hydrophyte; Usually occur in wetlands, but may occur in non-wetlands	x	x	x	x	x	x
Orchidaceae	Isotria verticillata	forb	perennial	2	7	3	FACU	Facultative Upland; Nonhydrophyte; Usually occur in non-wetlands, but may occur in wetlands				x	x	x
Juncaceae	Juncus canadensis	graminoid	perennial	7	7	-5	OBL	Obligate Wetland; Hydrophyte; Almost always occur in wetlands				x		x
Cupressaceae	Juniperus virginica	tree	perennial	7	1	3	FACU	Facultative Upland; Nonhydrophyte; Usually occur in non-wetlands, but may occur in wetlands	x		x
Poaceae	Leersia oryzoides	graminoid	perennial	7	4	-5	OBL	Obligate Wetland; Hydrophyte; Almost always occur in wetlands				x
Poaceae	Leersia virginica	graminoid	perennial	5	2	-3	FACW	Facultative Wetland; Hydrophyte; Usually occur in wetlands, but may occur in non-wetlands	x	x	x	x		x
Liliaceae	Lilium canadense	forb	perennial	7	9	0	FAC	Facultative; Hydrophyte; Occur in wetlands and non-wetlands	x	x	x	x	x	x
Linaceae	Linum striatum	forb	perennial	7	5	-3	FACW	Facultative Wetland; Hydrophyte; Usually occur in wetlands, but may occur in non-wetlands	x			x
Magnoliaceae	Liriodendron tulipifera	tree	perennial	5	2	3	FACU	Facultative Upland; Nonhydrophyte; Usually occur in non-wetlands, but may occur in wetlands	x	x	x	x	x	x
Campanulaceae	Lobelia nuttallii	forb	perennial	8	9	-3	FACW	Facultative Wetland; Hydrophyte; Usually occur in wetlands, but may occur in non-wetlands				x
Campanulaceae	Lobelia puberula	forb	perennial	8	6	3	FACU	Facultative Wetland; Hydrophyte; Usually occur in wetlands, but may occur in non-wetlands				x		x
Caprifoliaceae	Lonicera japonica	vine	perennial	6	0	3	FACU	Facultative Wetland; Hydrophyte; Usually occur in wetlands, but may occur in non-wetlands		x
Onagraceae	Ludwigia alternifolia	forb	perennial	8	3	-3	FACW	Facultative Wetland; Hydrophyte; Usually occur in wetlands, but may occur in non-wetlands				x		x
Lamiaceae	Lycopus virginicus	forb	perennial	5	4	-5	OBL	Obligate Wetland; Hydrophyte; Almost always occur in wetlands	x	x	x	x	x	x
Lygodiaceae	Lygodium palmatum	vine/fern	perennial	6	4	-3	FACW	Facultative Wetland; Hydrophyte; Usually occur in wetlands, but may occur in non-wetlands				x		x
Ericaceae	Lyonia ligustrina	shrub	perennial	6	7	-3	FACW	Facultative Wetland; Hydrophyte; Usually occur in wetlands, but may occur in non-wetlands	x	x	x	x	x	x
Primulaceae	Lysimachia quadrifolia	forb	perennial	5	6	3	FACU	Facultative Upland; Nonhydrophyte; Usually occur in non-wetlands, but may occur in wetlands	x	x	x	x	x	x
Magnoliaceae	Magnolia macrophylla	tree	perennial	3	8	5	UPL	Obligate Upland; Nonhydrophyte; Almost never occur in wetlands	x	x	x	x	x	x
Ruscaceae	Maianthemum racemosum	forb	perennial	4	5	5	UPL	Obligate Upland; Nonhydrophyte; Almost never occur in wetlands			x			x
Liliaceae	Medeola virginiana	forb	perennial	2	6	5	UPL	Obligate Upland; Nonhydrophyte; Almost never occur in wetlands	x	x	x	x	x	x
Poaceae	Microstegium vimineum	graminoid	annual	5	0	0	FAC	Facultative; Hydrophyte; Occur in wetlands and non-wetlands			x	x	x	x
Rubiaceae	Mitchella repens	forb	perennial	2	4	3	FACU	Facultative Upland; Nonhydrophyte; Usually occur in non-wetlands, but may occur in wetlands	x	x	x	x	x	x
Ericaceae	Monotropa uniflora	forb	perennial	1	10	5	UPL	Obligate Upland; Nonhydrophyte; Almost never occur in wetlands			x
Vitaceae	Muscadinia rotundifolia	vine	perennial	5	4	0	FAC	Facultative; Hydrophyte; Occur in wetlands and non-wetlands	x	x	x	x	x	x
Asteraceae	Nabalus serpentaria	forb	perennial	4	7	3	FACU	Facultative Upland; Nonhydrophyte; Usually occur in non-wetlands, but may occur in wetlands						x
Nyssaceae	Nyssa sylvatica	tree	perennial	5	4	0	FAC	Facultative; Hydrophyte; Occur in wetlands and non-wetlands	x	x	x	x	x	x
Osmundaceae	Osmunda spectabilis	fern	perennial	5	8	-5	OBL	Obligate Wetland; Hydrophyte; Almost always occur in wetlands	x	x	x	x	x	x
Osmundaceae	Osmundastrum cinnamomeum	fern	perennial	5	8	-3	FACW	Facultative Wetland; Hydrophyte; Usually occur in wetlands, but may occur in non-wetlands	x	x	x	x	x	x
Ericaceae	Oxydendrum arboreum	tree	perennial	4	5	5	UPL	Obligate Upland; Nonhydrophyte; Almost never occur in wetlands	x	x	x	x	x	x
Apiaceae	Oxypolis rigidior	forb	perennial	6	8	-5	OBL	Obligate Wetland; Hydrophyte; Almost always occur in wetlands	x	x		x
Thelypteridaceae	Parathelypteris noveboracensis	fern	perennial	4	5	0	FAC	Facultative; Hydrophyte; Occur in wetlands and non-wetlands		x	x	x	x	x
Vitaceae	Parthenocissus quinquefolia	vine	perennial	5	2	3	FACU	Facultative Upland; Nonhydrophyte; Usually occur in non-wetlands, but may occur in wetlands						x
Pinaceae	Pinus echinata	tree	perennial	7	5	3	FACU	Facultative Upland; Nonhydrophyte; Usually occur in non-wetlands, but may occur in wetlands			x		x
Orchidaceae	Platanthera ciliaris	forb	perennial	8	9	-3	FACW	Facultative Wetland; Hydrophyte; Usually occur in wetlands, but may occur in non-wetlands			x	x	x	x
Orchidaceae	Platanthera clavellata	forb	perennial	5	9	-3	FACW	Facultative Wetland; Hydrophyte; Usually occur in wetlands, but may occur in non-wetlands	x	x	x	x	x	x
Orchidaceae	Platanthera cristata	forb	perennial	7	10	-3	FACW	Facultative Wetland; Hydrophyte; Usually occur in wetlands, but may occur in non-wetlands	x	x	x	x		x
Orchidaceae	Platanthera integrilabia	forb	perennial	7	10	-5	OBL	Obligate Wetland; Hydrophyte; Almost always occur in wetlands			x	x	x	x
Dryopteridaceae	Polystichum acrostichoides	fern	perennial	3	4	3	FACU	Facultative Upland; Nonhydrophyte; Usually occur in non-wetlands, but may occur in wetlands	x					x
Rosaeae	Prunus serotina	tree	perennial	5	3	3	FACU	Facultative Upland; Nonhydrophyte; Usually occur in non-wetlands, but may occur in wetlands			x			x
Fagaceae	Quercus alba	tree	perennial	6	5	3	FACU	Facultative Upland; Nonhydrophyte; Usually occur in non-wetlands, but may occur in wetlands	x	x	x	x	x	x
Fagaceae	Quercus rubra var. rubra	tree	perennial	4	6	3	FACU	Facultative Upland; Nonhydrophyte; Usually occur in non-wetlands, but may occur in wetlands	x	x	x	x	x	x
Fagaceae	Quercus stellata	tree	perennial	8	5	5	UPL	Obligate Upland; Nonhydrophyte; Almost never occur in wetlands			x	x
Fagaceae	Quercus velutina	tree	perennial	6	5	5	UPL	Obligate Upland; Nonhydrophyte; Almost never occur in wetlands	x	x	x	x		x
Melastomaceae	Rhexia virginica	forb	perennial	8	4	-5	OBL	Obligate Wetland; Hydrophyte; Almost always occur in wetlands				x		x
Ericaceae	Rhododendron calendulaceum	shrub	perennial	6	7	5	UPL	Obligate Upland; Nonhydrophyte; Almost never occur in wetlands			x	x
Anacardiaceae	Rhus copallinum var. latifolia	shrub	perennial	7	2	5	UPL	Obligate Upland; Nonhydrophyte; Almost never occur in wetlands				x
Cyperaceae	Rhynchospora capitellata	graminoid	perennial	8	7	-5	OBL	Obligate Wetland; Hydrophyte; Almost always occur in wetlands				x		x
Rosaeae	Rosa multiflora	shrub	perennial	6	0	3	FACU	Facultative Upland; Nonhydrophyte; Usually occur in non-wetlands, but may occur in wetlands				x		x
Rosaeae	Rubus hispidus	shrub	perennial	7	5	3	FACU	Facultative Upland; Nonhydrophyte; Usually occur in non-wetlands, but may occur in wetlands	x	x	x	x	x	x
Rosaeae	Rubus pensilvanicus	shrub	perennial	8	3	5	UPL	Obligate Upland; Nonhydrophyte; Almost never occur in wetlands				x	x	x
Apiaceae	Sanicula canadensis	forb	perennial	3	5	5	UPL	Obligate Upland; Nonhydrophyte; Almost never occur in wetlands						x
Lauraceae	Sassafras albidum	tree	perennial	5	2	3	FACU	Facultative Upland; Nonhydrophyte; Usually occur in non-wetlands, but may occur in wetlands		x		x	x	x
Smilacaceae	Smilax glauca	vine	perennial	6	3	3	FACU	Facultative Upland; Nonhydrophyte; Usually occur in non-wetlands, but may occur in wetlands	x	x	x	x	x	x
Smilacaceae	Smilax rotundifolia	vine	perennial	5	4	0	FAC	Facultative; Hydrophyte; Occur in wetlands and non-wetlands	x	x	x	x	x	x
Asteraceae	Solidago gigantea	forb	perennial	8	3	-3	FACW	Facultative Wetland; Hydrophyte; Usually occur in wetlands, but may occur in non-wetlands				x		x
Asteraceae	Solidago rugosa ssp. rugosa	forb	perennial	6	4	0	FAC	Facultative; Hydrophyte; Occur in wetlands and non-wetlands	x	x	x	x	x	x
Sphagnaceae	Sphagnum palustre	bryophyte	perennial	5	8	-5	OBL	Obligate Wetland; Hydrophyte; Almost always occur in wetlands	x	x	x	x	x	x
Asteraceae	Symphyotrichum lateriflorum	forb	perennial	5	3	-3	FACW	Facultative Wetland; Hydrophyte; Usually occur in wetlands, but may occur in non-wetlands	x	x		x		x
Orchidaceae	Tipularia discolor	forb	perennial	3	5	3	FACU	Facultative Upland; Nonhydrophyte; Usually occur in non-wetlands, but may occur in wetlands						x
Anacardiaceae	Toxicodendron radicans	vine	perennial	5	2	0	FAC	Facultative; Hydrophyte; Occur in wetlands and non-wetlands					x	x
Colchicaceae	Uvularia sessilifolia	forb	perennial	2	5	3	FACU	Facultative Upland; Nonhydrophyte; Usually occur in non-wetlands, but may occur in wetlands						x
Ericaceae	Vaccinium corymbosum	shrub	perennial	5	5	-3	FACW	Facultative Wetland; Hydrophyte; Usually occur in wetlands, but may occur in non-wetlands	x	x	x	x	x	x
Ericaceae	Vaccinium pallidum	shrub	perennial	5	4	5	UPL	Obligate Upland; Nonhydrophyte; Almost never occur in wetlands	x	x	x	x	x	x
Ericaceae	Vaccinium stamineum	shrub	perennial	5	4	5	UPL	Obligate Upland; Nonhydrophyte; Almost never occur in wetlands			x	x
Viburnaceae	Viburnum acerifolium	shrub	perennial	3	8	5	UPL	Obligate Upland; Nonhydrophyte; Almost never occur in wetlands						x
Violaceae	Viola blanda	forb	perennial	2	6	-3	FACW	Facultative Wetland; Hydrophyte; Usually occur in wetlands, but may occur in non-wetlands					x	x
Violaceae	Viola cucullata	forb	perennial	5	4	-3	FACW	Facultative Wetland; Hydrophyte; Usually occur in wetlands, but may occur in non-wetlands					x
Violaceae	Viola primulifolia	forb	perennial	5	6	0	FAC	Facultative; Hydrophyte; Occur in wetlands and non-wetlands	x	x	x	x	x	x
*Italicized species are invasive non native plants
